# Supplementary material
Source: PubMed Central journal article supplement (PMC2561939)
Supplement: mmc1.pdf [file mmc1.pdf]

## Supplemental Data

### The H Syndrome Is Caused by Mutations in the Nucleoside Transporter hENT3

Vered Molho-Pessach, Israela Lerer, Dvorah Abeliovich, Ziad Agha, Abdulasalam Abu Libdeh, Valentina Broshtilova, Orly Elpeleg, and Abraham Zlotogorski

**Table S1. Primer Sequences and PCR Product Size for *SLC29A3***

| Exon | Primer | Sequence                | Fragment size (bp) |
|------|--------|-------------------------|--------------------|
| 1    | F      | AGGAGCCCGCCTGCCGCCTG    | 150                |
| 1    | R      | GTCGCTGAGCGCGAGTCTGG    |                    |
| 2    | F      | CCCAGCCTTGGTTTCTACTC    | 499                |
| 2    | R      | ACCATAATTTGCATCTTCTTCC  |                    |
| 3    | F      | GCGTGGAAGTCTCACCT       | 248                |
| 3    | R      | CCACCACTTAAGTAGGCAGAAAA |                    |
| 4    | F      | GCTTCCCTTAAGGTGGCTCA    | 390                |
| 4    | R      | CACCACATGCTCATCTCTGG    |                    |
| 5    | F      | GGTTTGTGAAACCCAAGCAG    | 394                |
| 5    | R      | CACCAGCCAAGCCTATTTGT    |                    |
| 6    | F      | GACTCAGATCCCAAGCAACC    | 822                |
| 6    | R      | TCTGCTCTCTGTCCCAAGT     |                    |

**Table S2. Haplotype Analysis in Arab and Bulgarian Patients Homozygous for the c. 1279G>A Mutation**

| Marker          | Physical location | Patient <i>BII-3</i> |   | Patient <i>KII-1</i> |   |
|-----------------|-------------------|----------------------|---|----------------------|---|
|                 | (Mb)              |                      |   |                      |   |
| <b>D10S1665</b> | 70.9              | 1                    | 1 | 3                    | 3 |
| <b>D10S529</b>  | 71.5              | 1                    | 1 | 4                    | 4 |
| <b>D10S537</b>  | 72.0              | 1                    | 1 | 7                    | 7 |
| <b>D10S1650</b> | 72.9              | 1                    | 1 | 3                    | 3 |
| <b>D10S606</b>  | 73.0              | 1                    | 1 | 4                    | 4 |

The microsatellite polymorphic markers span the *SLC29A3* gene.
